# Supplementary material for: A novel c.64G > T (p.G22C) NR5A1 variant in a Chinese adolescent with 46,XY disorders of sex development: a case report
Source: Springer Nature journal article supplement (doi:10.1186/s12887-023-03974-7), 2023-04-19
Supplement: MOESM1 [file 25259534]

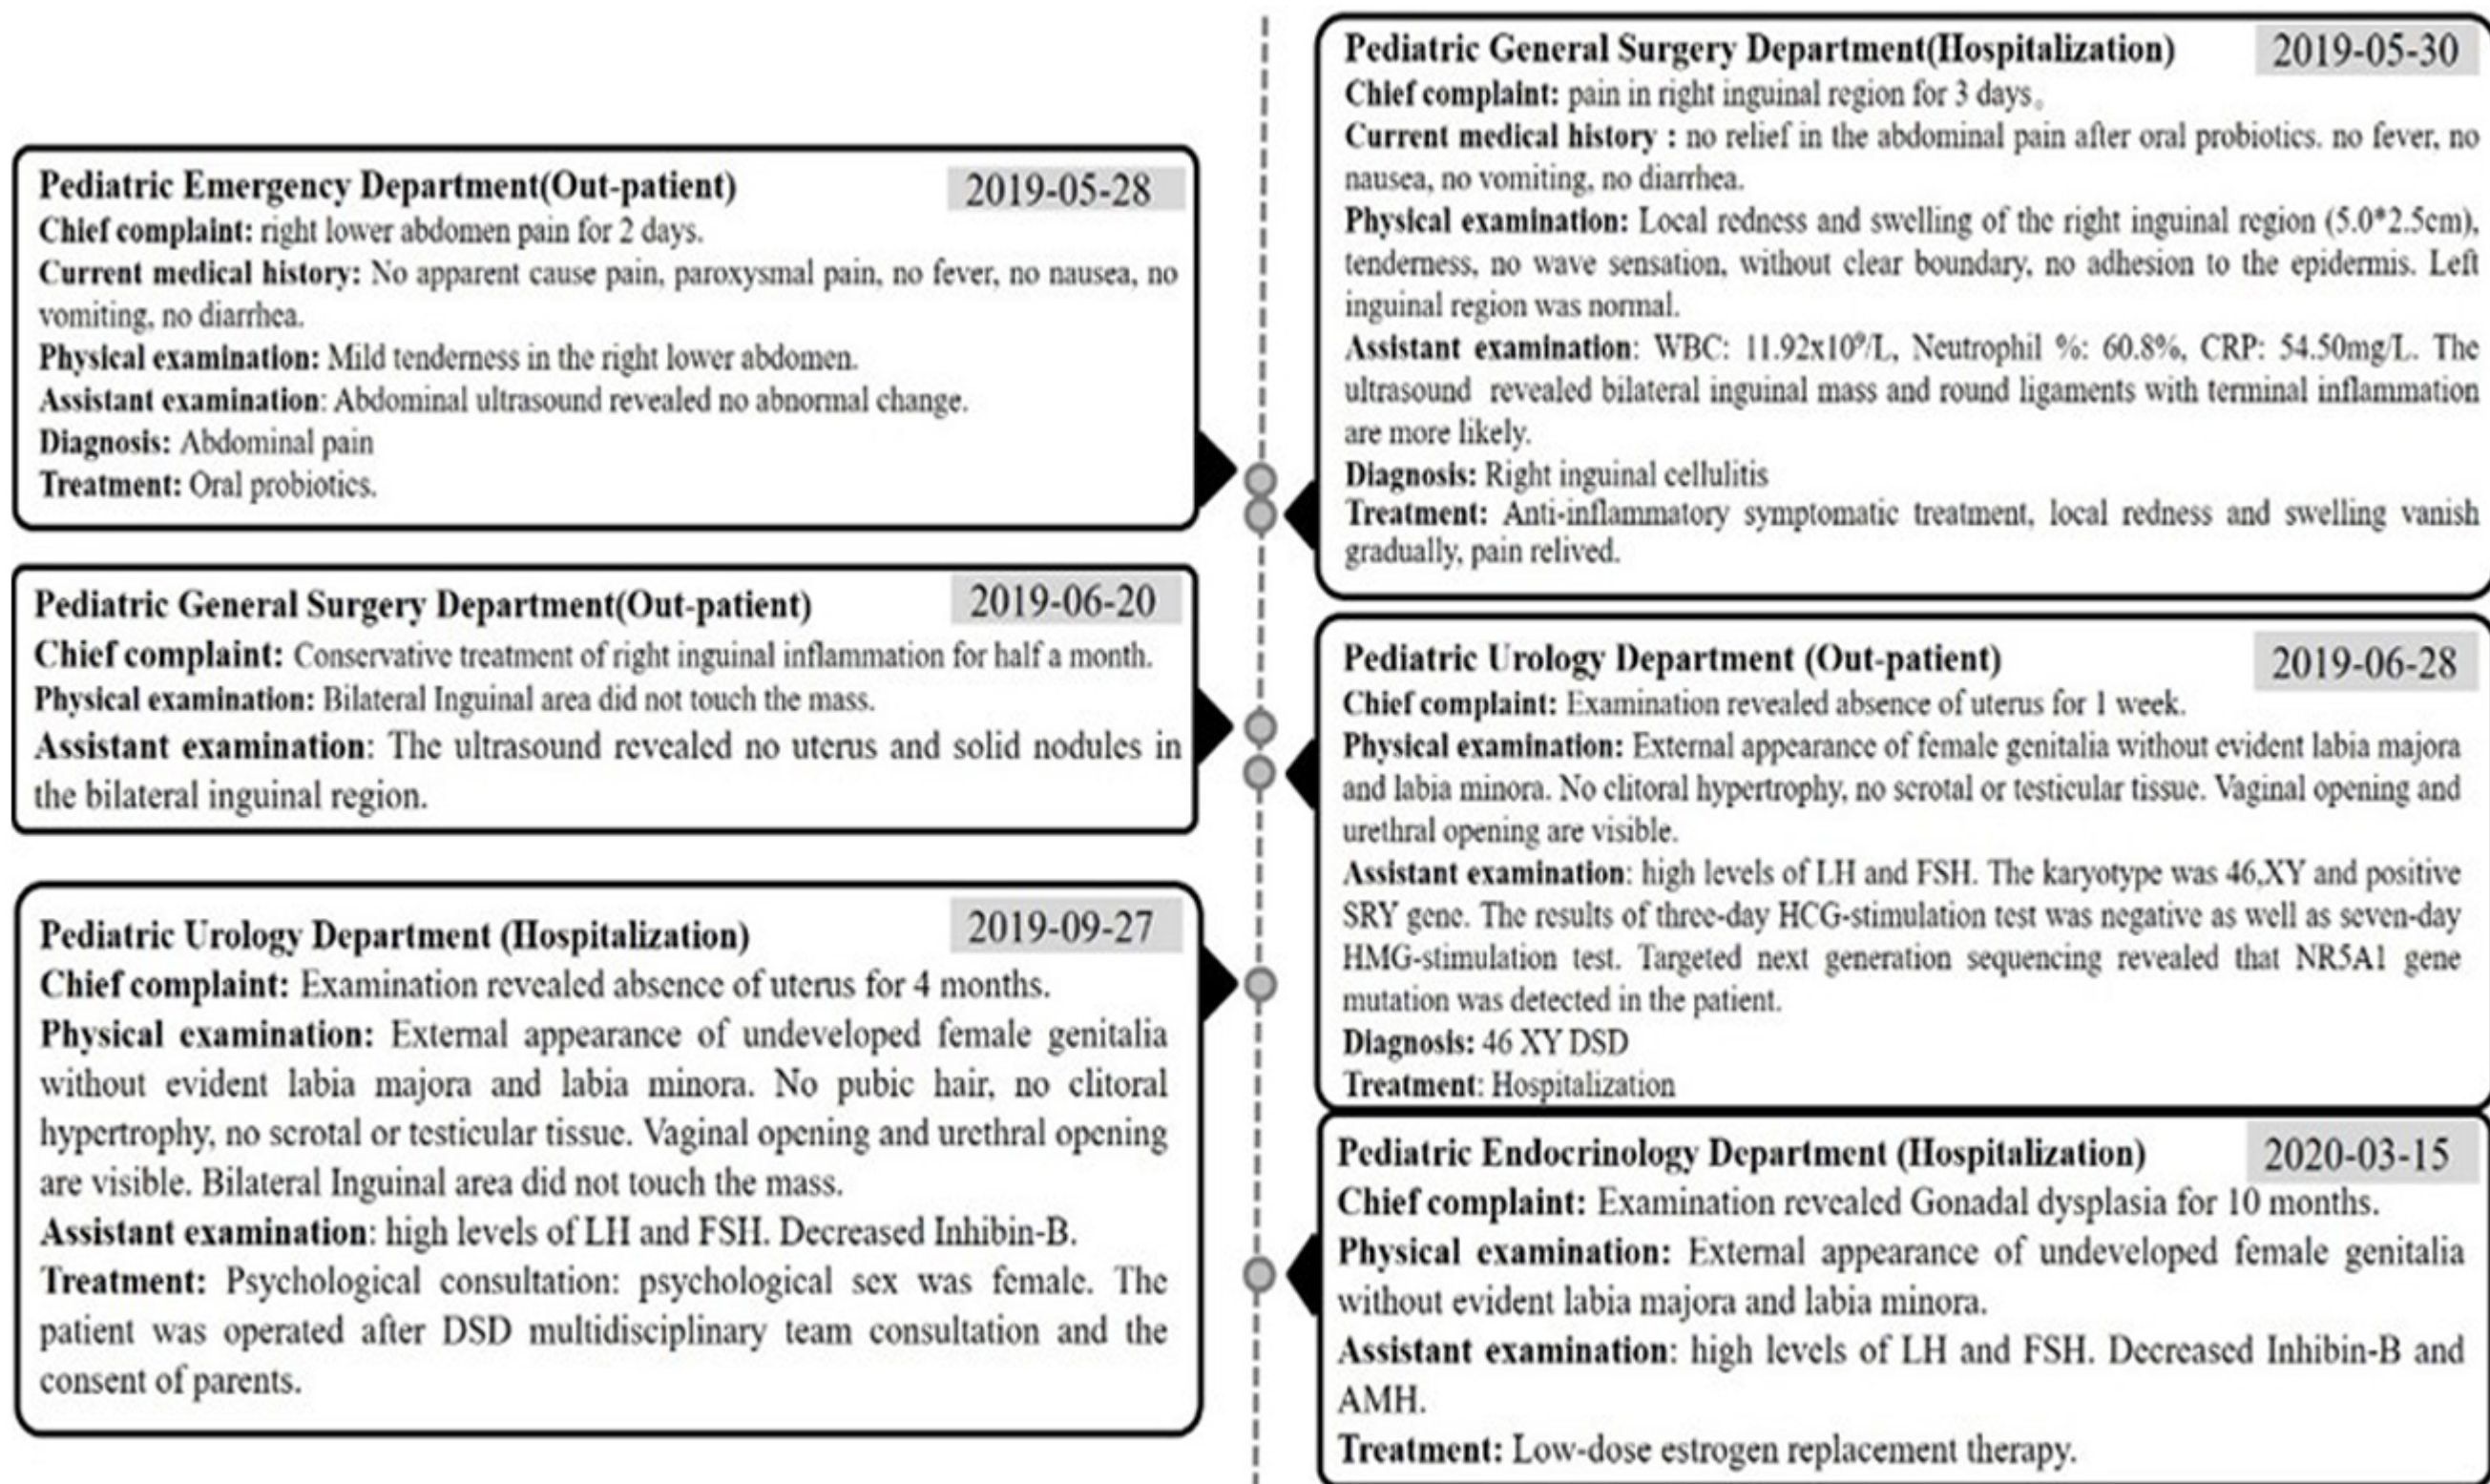

**Supplementary Fig. 1. Timeline of the diagnostic process for the patient.**
