# Supplementary material for: A novel c.64G > T (p.G22C) NR5A1 variant in a Chinese adolescent with 46,XY disorders of sex development: a case report
Source: Springer Nature journal article supplement (doi:10.1186/s12887-023-03974-7), 2023-04-19
Supplement: MOESM2 [file 25259534]

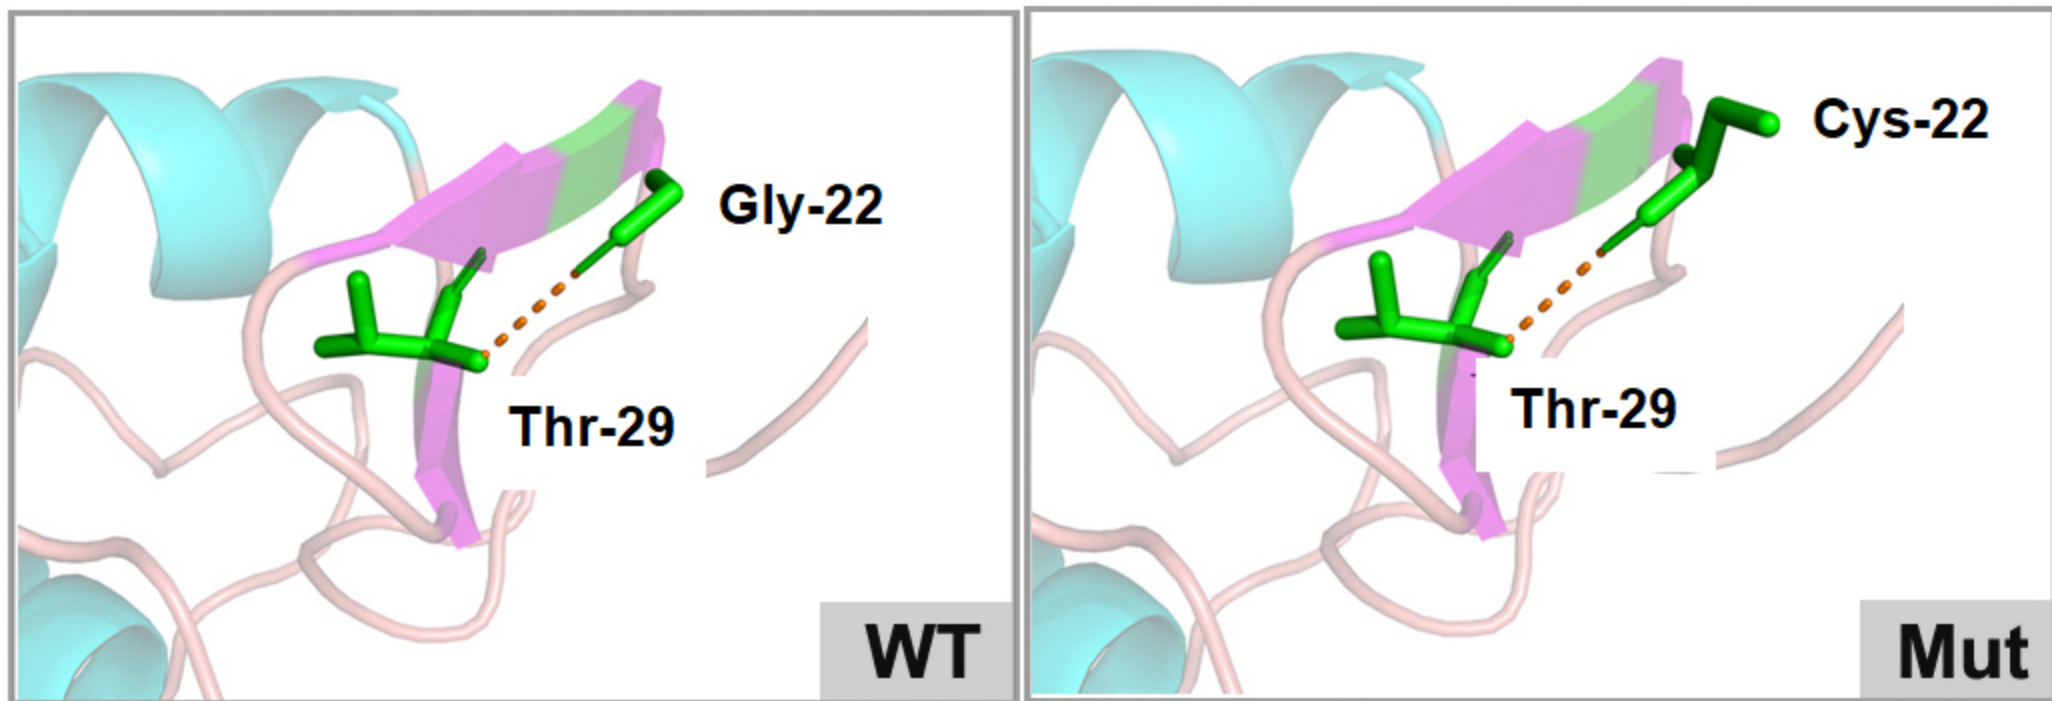

**Supplementary Fig. 2. Conformational changes in the NR5A1 mutant.** The residue at position 22 changes from a hydrophobic to hydrophilic amino acid with the G22C substitution; both the WT and NR5A1-Mut proteins show the formation of a hydrogen bond with Thr29.
