# Supplementary material for: A novel c.64G > T (p.G22C) NR5A1 variant in a Chinese adolescent with 46,XY disorders of sex development: a case report
Source: Springer Nature journal article supplement (doi:10.1186/s12887-023-03974-7), 2023-04-19
Supplement: MOESM3 [file 25259534]

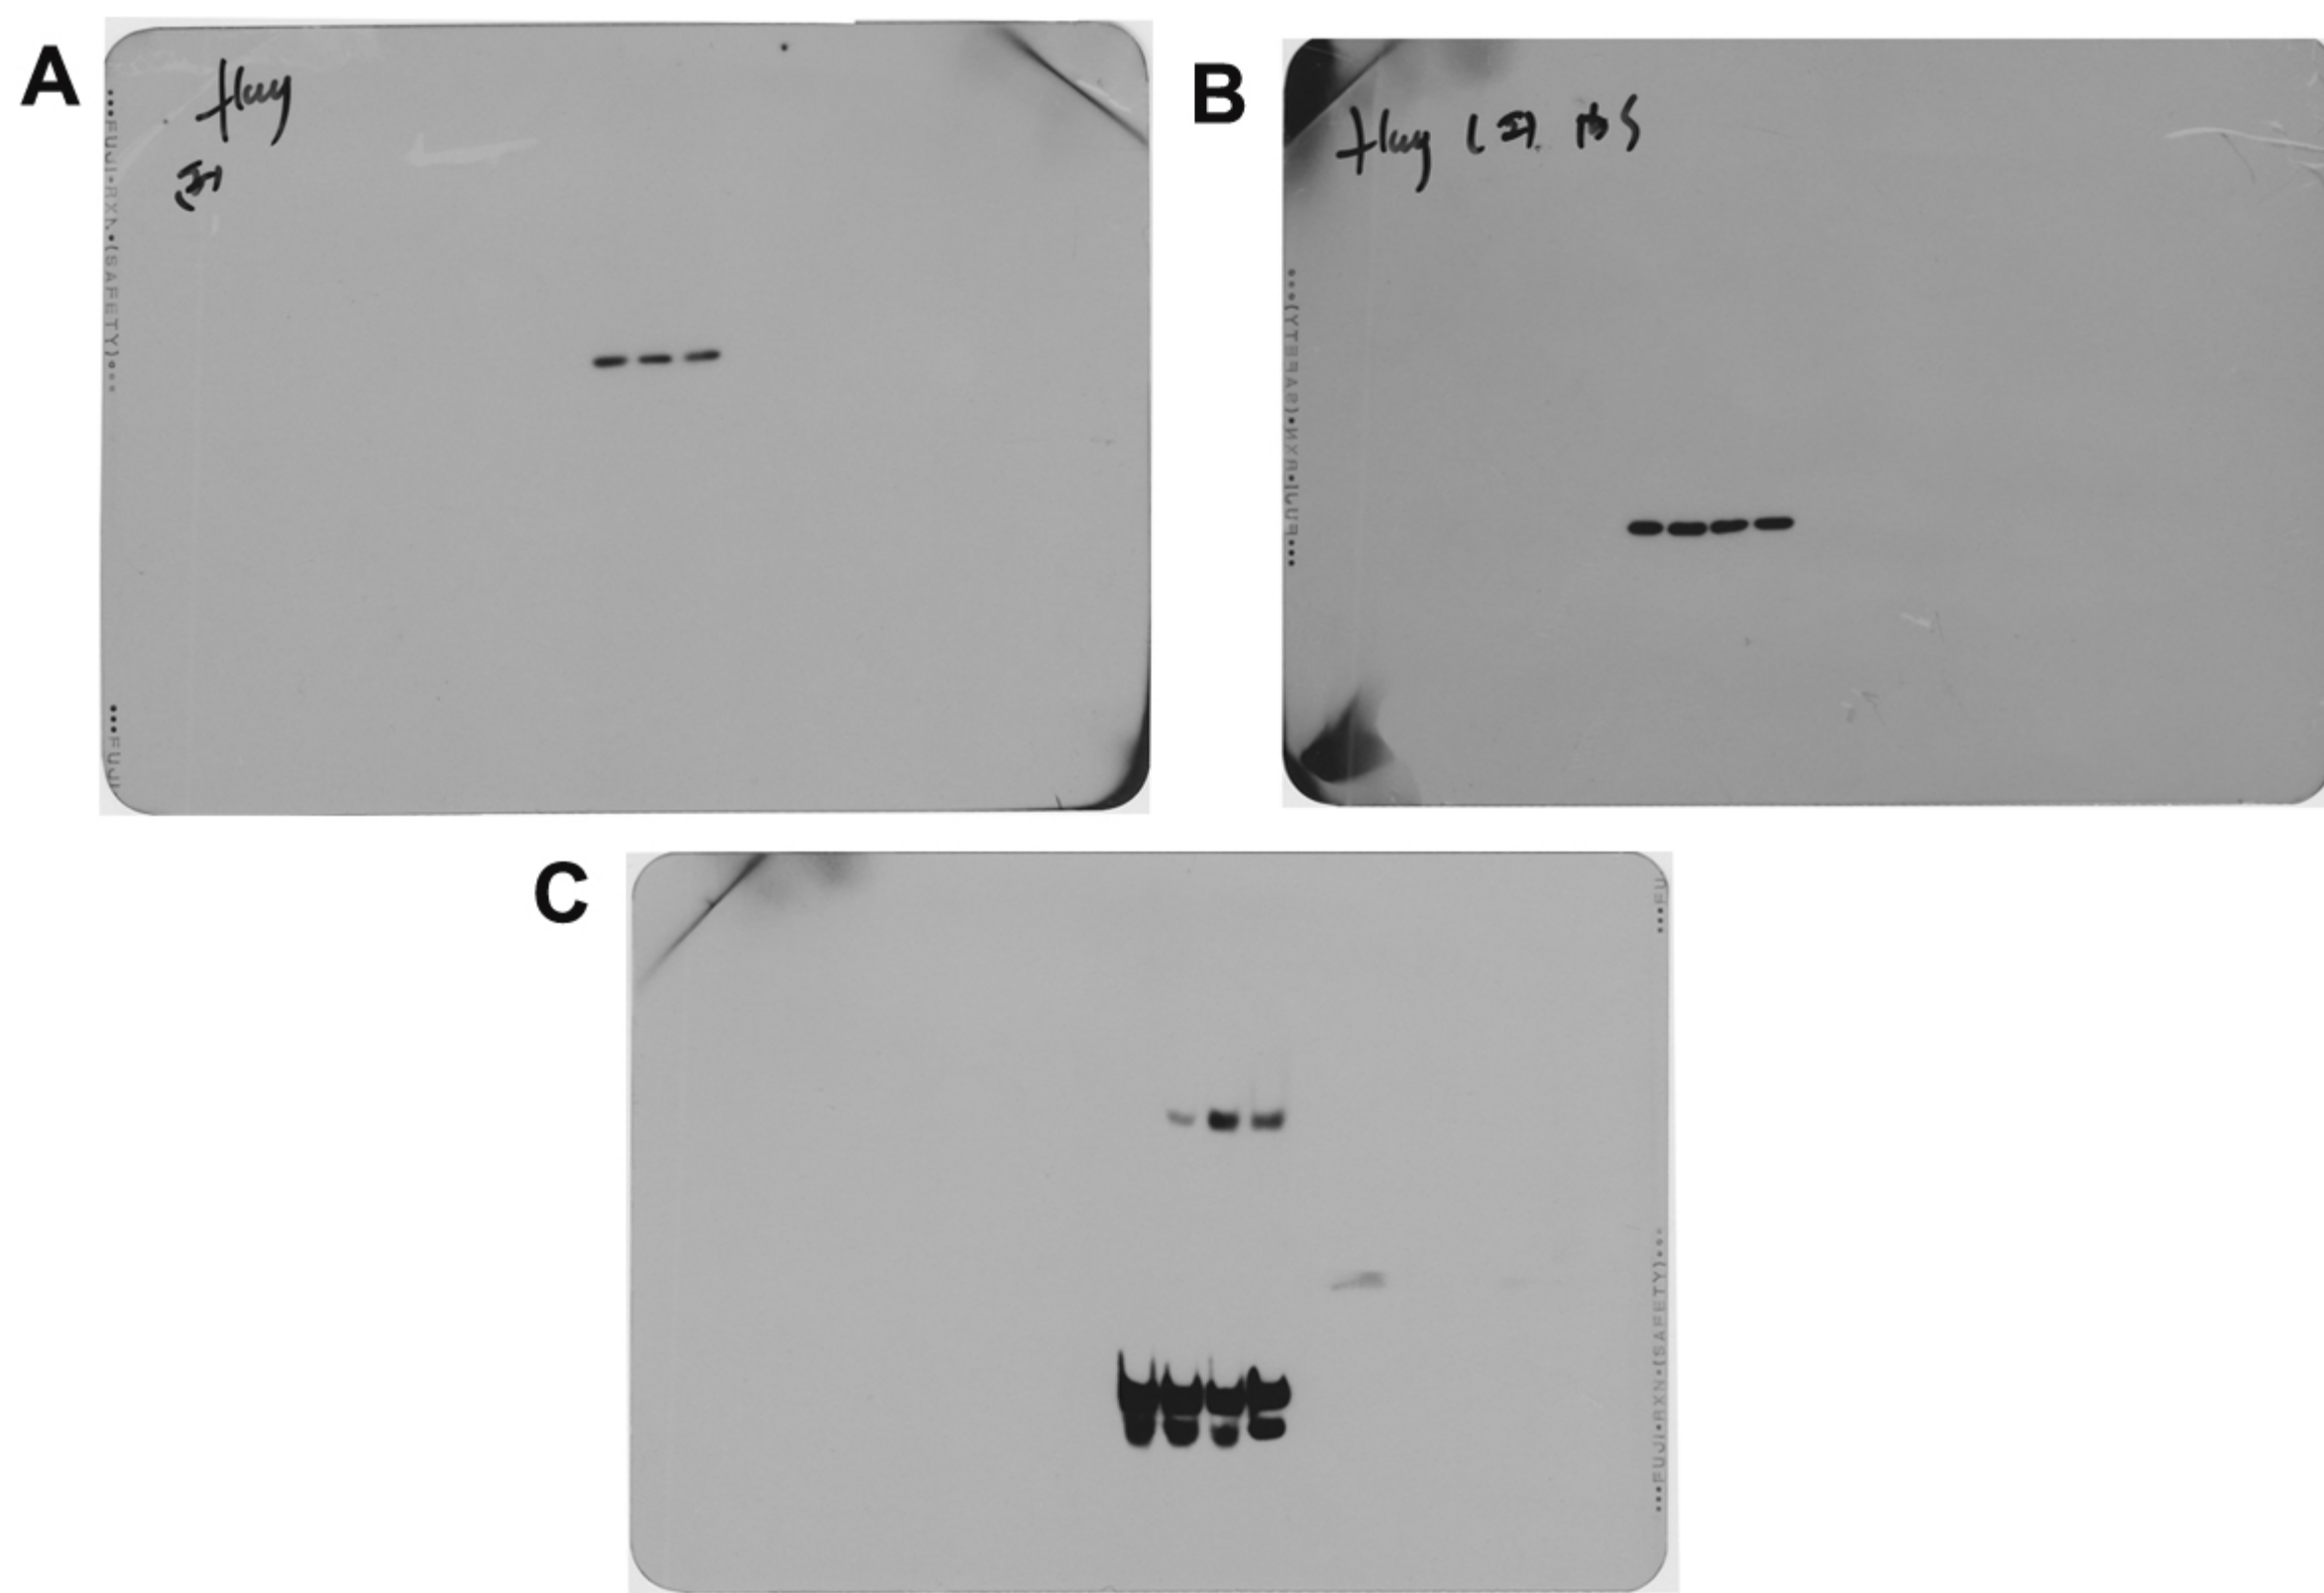

**Supplementary Fig. 3. The raw figures of gels (EMSA) and the blots (Western blot)** (A) The bands of the internal reference ( $\beta$ -actin). From left to right, these bands are non-transfected (Control, undeveloped band), transfected with an empty vector (Vector), Myc-tagged WT (WT), and c.64G>T (p.G22C) NR5A1-Mut (Mut) vectors; (B) NR5A1 expression in 293T cells according to western blot analysis. (same grouping as A); (C) EMSAs results showing altered DNA binding by the NR5A1 mutant (same grouping as A).
