# Supplementary material for: A novel c.64G > T (p.G22C) NR5A1 variant in a Chinese adolescent with 46,XY disorders of sex development: a case report
Source: Springer Nature journal article supplement (doi:10.1186/s12887-023-03974-7), 2023-04-19
Supplement: MOESM4 [file 25259534]

**Supplementary Table 1.** List of 360 endocrine-related genes detected by TRS.

| <i>A2ML1</i>    | <i>CA2</i>      | <i>DUOXA2</i>  | <i>HARS2</i>   | <i>LARS2</i>    | <i>OTX2</i>     | <i>ROR2</i>     | <i>TACR3</i>   | <i>ORC1</i>    |
|-----------------|-----------------|----------------|----------------|-----------------|-----------------|-----------------|----------------|----------------|
| <i>AARS2</i>    | <i>CACNA1S</i>  | <i>DUSP6</i>   | <i>HDAC8</i>   | <i>LHB</i>      | <i>PALB2</i>    | <i>RSPO1</i>    | <i>TAF4B</i>   | <i>RNF216</i>  |
| <i>ABCA1</i>    | <i>CASR</i>     | <i>EIF2AK3</i> | <i>HESX1</i>   | <i>LHCGR</i>    | <i>PALLD</i>    | <i>RFXP2</i>    | <i>TBCE</i>    | <i>TAC3</i>    |
| <i>ABCD1</i>    | <i>CBX2</i>     | <i>EPO</i>     | <i>HFMI</i>    | <i>LHX4</i>     | <i>PAX6</i>     | <i>RXRB</i>     | <i>TG</i>      | <i>STAT5B</i>  |
| <i>ABCC8</i>    | <i>CATSPER1</i> | <i>ENPP1</i>   | <i>HFE</i>     | <i>LHX3</i>     | <i>PAX4</i>     | <i>RXRA</i>     | <i>TBX19</i>   | <i>STK11</i>   |
| <i>ACVR1B</i>   | <i>CCDC28B</i>  | <i>ERCC6</i>   | <i>HGF</i>     | <i>LZTFL1</i>   | <i>PAX8</i>     | <i>RYR1</i>     | <i>THRA</i>    | <i>SYCP3</i>   |
| <i>AGT</i>      | <i>CD96</i>     | <i>ERCC8</i>   | <i>HNFI1A</i>  | <i>MAMLD1</i>   | <i>PCMI</i>     | <i>SCN4A</i>    | <i>THRB</i>    | <i>RFX6</i>    |
| <i>AIP</i>      | <i>CDC73</i>    | <i>ESR1</i>    | <i>HNFI1B</i>  | <i>MAP2K1</i>   | <i>PCNT</i>     | <i>SCNN1A</i>   | <i>TMEM67</i>  | <i>RIPK4</i>   |
| <i>AIRE</i>     | <i>CDKN1C</i>   | <i>FEZF1</i>   | <i>HNFI4A</i>  | <i>MAP2K2</i>   | <i>PCSK1</i>    | <i>SCNN1B</i>   | <i>TP53</i>    | <i>RIT1</i>    |
| <i>AKR1C2</i>   | <i>CDKN2A</i>   | <i>FGD1</i>    | <i>HOXA13</i>  | <i>MAP3K1</i>   | <i>PDE11A</i>   | <i>SCNN1G</i>   | <i>TPO</i>     | <i>NSDHL</i>   |
| <i>AKR1C4</i>   | <i>CEL</i>      | <i>FGF17</i>   | <i>HRAS</i>    | <i>MAPK8IP1</i> | <i>PDE8B</i>    | <i>SDCCAG8</i>  | <i>TRH</i>     | <i>NSMF</i>    |
| <i>AKT2</i>     | <i>CEP19</i>    | <i>FGF23</i>   | <i>HS6ST1</i>  | <i>MC2R</i>     | <i>PDX1</i>     | <i>SDHB</i>     | <i>TRHR</i>    | <i>NTRK1</i>   |
| <i>ALB</i>      | <i>CEP290</i>   | <i>FGF8</i>    | <i>HSD11B1</i> | <i>MCM4</i>     | <i>PHOX</i>     | <i>SDHD</i>     | <i>TRIM24</i>  | <i>KLHL10</i>  |
| <i>ALG3</i>     | <i>CFTR</i>     | <i>FGFR1</i>   | <i>HSD11B2</i> | <i>MCM9</i>     | <i>PHF6</i>     | <i>SECISBP2</i> | <i>TRIM32</i>  | <i>KMT2D</i>   |
| <i>AMH</i>      | <i>CHD7</i>     | <i>FIGLA</i>   | <i>HSD17B3</i> | <i>MED12</i>    | <i>PLAGL1</i>   | <i>SEMA3A</i>   | <i>TRIM33</i>  | <i>KRAS</i>    |
| <i>AMHR2</i>    | <i>CHRM3</i>    | <i>FLRT3</i>   | <i>HSD17B4</i> | <i>MEN1</i>     | <i>PNLIP</i>    | <i>SEMA3E</i>   | <i>TSHB</i>    | <i>GOPC</i>    |
| <i>ANOS1</i>    | <i>CLCN5</i>    | <i>FMR1</i>    | <i>HSD3B2</i>  | <i>MID1</i>     | <i>POF1B</i>    | <i>SHOC2</i>    | <i>TSHR</i>    | <i>GPR101</i>  |
| <i>APOA1</i>    | <i>CLCNKA</i>   | <i>FOXE1</i>   | <i>IARS2</i>   | <i>MINPP1</i>   | <i>POLR3A</i>   | <i>SLC12A1</i>  | <i>TSPYL1</i>  | <i>H6PD</i>    |
| <i>AQP2</i>     | <i>CLCNKB</i>   | <i>FOXE2</i>   | <i>ICK</i>     | <i>MKKS</i>     | <i>POLR3B</i>   | <i>SLC12A3</i>  | <i>TTC8</i>    | <i>DMP1</i>    |
| <i>AR</i>       | <i>CLDN2</i>    | <i>FOXP3</i>   | <i>IER3IP1</i> | <i>MKRN3</i>    | <i>POMC</i>     | <i>SLC16A1</i>  | <i>TTR</i>     | <i>DMRT1</i>   |
| <i>ARL6</i>     | <i>CLEC7A</i>   | <i>FSHR</i>    | <i>IGF1</i>    | <i>MKS1</i>     | <i>PONI</i>     | <i>SLC16A2</i>  | <i>TWNK</i>    | <i>DPY19L2</i> |
| <i>ARMC5</i>    | <i>CLPP</i>     | <i>GATA3</i>   | <i>IGF1R</i>   | <i>MXN1</i>     | <i>POR</i>      | <i>SLC19A2</i>  | <i>TXNRD2</i>  | <i>BRCA1</i>   |
| <i>ARX</i>      | <i>COX4I2</i>   | <i>GATA4</i>   | <i>IGF2</i>    | <i>MRAP</i>     | <i>POU1F1</i>   | <i>SLC26A3</i>  | <i>UCP2</i>    | <i>BRCA2</i>   |
| <i>ATM</i>      | <i>CPA1</i>     | <i>GATA6</i>   | <i>IGFALS</i>  | <i>MYH8</i>     | <i>PRKACA</i>   | <i>SLC26A4</i>  | <i>UBR1</i>    | <i>BSND</i>    |
| <i>ATP6V0A4</i> | <i>CTRC</i>     | <i>GCK</i>     | <i>IGSF1</i>   | <i>NAA10</i>    | <i>PRKAR1A</i>  | <i>SLC26A8</i>  | <i>USP9Y</i>   | <i>DUOX2</i>   |
| <i>ATP6V0B1</i> | <i>CTSB</i>     | <i>GCM2</i>    | <i>IGSF10</i>  | <i>NANOS1</i>   | <i>PRKCA</i>    | <i>SLC2A2</i>   | <i>VDR</i>     | <i>HADH</i>    |
| <i>ATRX</i>     | <i>CUL3</i>     | <i>GH1</i>     | <i>IL17RD</i>  | <i>NCO44</i>    | <i>PROK2</i>    | <i>SLC34A3</i>  | <i>VEGFA</i>   | <i>KRT8</i>    |
| <i>AURKC</i>    | <i>CYB5A</i>    | <i>GH2</i>     | <i>IL1RN</i>   | <i>NDUFA13</i>  | <i>PROKR2</i>   | <i>SLC4A1</i>   | <i>WDPCP</i>   | <i>SRY</i>     |
| <i>AVP</i>      | <i>CYP11A1</i>  | <i>GHR</i>     | <i>INS</i>     | <i>NEK8</i>     | <i>PROP1</i>    | <i>SLC4A4</i>   | <i>WDR11</i>   | <i>STAG3</i>   |
| <i>AVPR2</i>    | <i>CYP11B1</i>  | <i>GHRH</i>    | <i>INSL3</i>   | <i>NEUROD1</i>  | <i>PRSSI</i>    | <i>SLC5A5</i>   | <i>WNK1</i>    | <i>STAR</i>    |
| <i>BBS1</i>     | <i>CYP11B2</i>  | <i>GHRHR</i>   | <i>INSR</i>    | <i>NEUROG3</i>  | <i>PSMC3IP</i>  | <i>SOD2</i>     | <i>WNK4</i>    | <i>RBBP8</i>   |
| <i>BBS10</i>    | <i>CYP17A1</i>  | <i>GHSR</i>    | <i>IRF6</i>    | <i>NKX2-1</i>   | <i>PTEN</i>     | <i>SOS1</i>     | <i>WNT3</i>    | <i>REN</i>     |
| <i>BBS12</i>    | <i>CYP19A1</i>  | <i>GK</i>      | <i>IYD</i>     | <i>NKX2-2</i>   | <i>PTF1A</i>    | <i>SOX10</i>    | <i>WNT4</i>    | <i>RET</i>     |
| <i>BBS2</i>     | <i>CYP21A2</i>  | <i>GK2</i>     | <i>KCNJ1</i>   | <i>NKX2-5</i>   | <i>PTH</i>      | <i>SOX3</i>     | <i>WNT5A</i>   | <i>NR3C2</i>   |
| <i>BBS4</i>     | <i>CYP27B1</i>  | <i>GLCC11</i>  | <i>KCNJ10</i>  | <i>NNT</i>      | <i>PTPN11</i>   | <i>SOX9</i>     | <i>WT1</i>     | <i>NR5A1</i>   |
| <i>BBS5</i>     | <i>CYP2R1</i>   | <i>GLIS3</i>   | <i>KCNJ11</i>  | <i>NOBOX</i>    | <i>RAB23</i>    | <i>SPATA16</i>  | <i>ZFAT</i>    | <i>NRAS</i>    |
| <i>BBS7</i>     | <i>DAZL</i>     | <i>GLUD1</i>   | <i>KCNJ2</i>   | <i>NPHP3</i>    | <i>RAB3GAP2</i> | <i>SPINK1</i>   | <i>ZFP57</i>   | <i>KLHL3</i>   |
| <i>BBS9</i>     | <i>DCAF17</i>   | <i>GNAI2</i>   | <i>KDM6A</i>   | <i>NR0B1</i>    | <i>RAF1</i>     | <i>SPRY4</i>    | <i>ZMYND15</i> | <i>GOLGA5</i>  |
| <i>BCAM</i>     | <i>DHCR7</i>    | <i>GNAS</i>    | <i>KISS1</i>   | <i>NR3C1</i>    | <i>RASA2</i>    | <i>SRD5A2</i>   | <i>BTK</i>     | <i>DICER1</i>  |
| <i>BLK</i>      | <i>DHH</i>      | <i>GNRH1</i>   | <i>KISS1R</i>  | <i>BMP15</i>    | <i>DIAPH2</i>   | <i>GNRHR</i>    | <i>KLF11</i>   | <i>BRAF</i>    |
