# Supplementary material for: A novel c.64G > T (p.G22C) NR5A1 variant in a Chinese adolescent with 46,XY disorders of sex development: a case report
Source: Springer Nature journal article supplement (doi:10.1186/s12887-023-03974-7), 2023-04-19
Supplement: MOESM5 [file 25259534]

**Supplementary Table 2.** Prediction of the impact of the c.64G>T (p.G22C) *NR5A1* variant.

| Prediction software                                      | Score/Grade | Harmful | Definition of "harmful"                                                                  |
|----------------------------------------------------------|-------------|---------|------------------------------------------------------------------------------------------|
| Scale-invariant feature transform (SIFT)                 | 0.03        | yes     | Score <0.05                                                                              |
| Protein Variation Effect Analyzer (PROVEAN)              | -5.652      | yes     | ≤ threshold (-2.5)                                                                       |
| Polymorphism Phenotyping v2 (PolyPhen-2)                 | 1.000       | yes     | Score ~0.447-0.909: potentially harmful<br>Score ~0.910-1.000: very likely to be harmful |
| Align-Grantham Variation/Grantham Deviation (Align-GVGD) | C65         | yes     | ~C0-C65: predicted pathogenicity grade from low to high                                  |
